# Supplementary material for: Natural sesquiterpene quinone/quinols: chemistry, biological activity, and synthesis
Source: Royal Society of Chemistry journal article supplement (doi:10.1039/d2np00045h), 2023-01-01

## **Natural sesquiterpene quinone/quinols: Chemistry, biological activities, and synthesis**

Xin-Hui Tian,<sup>a,b</sup> Li-Li Hong,<sup>a</sup> Wei-Hua Jiao,<sup>a</sup> and Hou-Wen Lin<sup>\*,a</sup>

### Affiliation

<sup>a</sup>Marine Drugs Research Center, Department of Pharmacy, State Key Laboratory of Oncogenes and Related Genes, Ren Ji Hospital, School of Medicine, Laboratory of Microbial Metabolism and School of Life Science & Biotechnology, Shanghai Jiao Tong University, Shanghai 200127, P. R. China.

<sup>b</sup>Institute of Interdisciplinary Integrative Medicine Research, Shanghai University of Traditional Chinese Medicine, Shanghai 201203, P. R. China.

E-mail: [franklin67@126.com](mailto:franklin67@126.com)

Contents-Compilation of all the sesquiterpene quinone/quinols



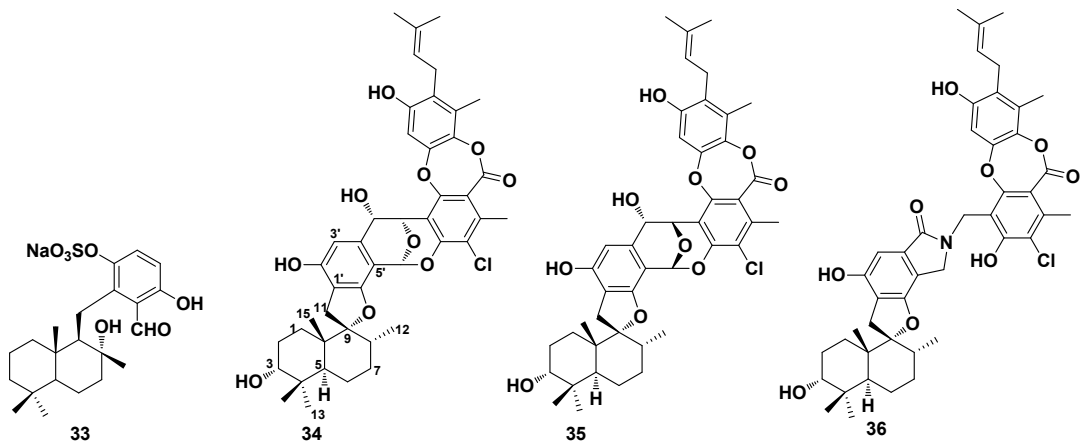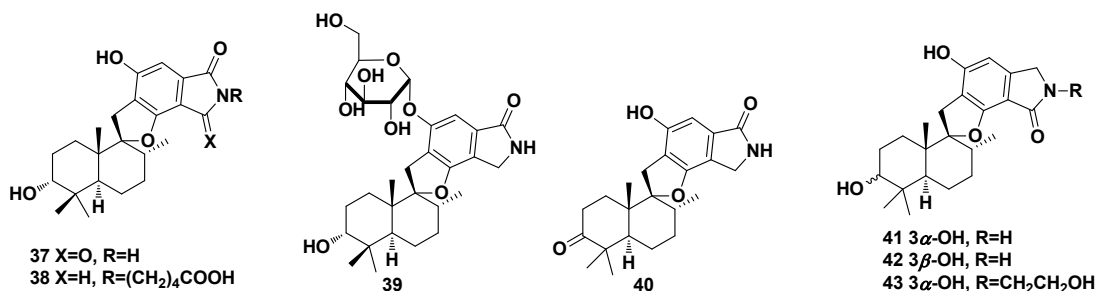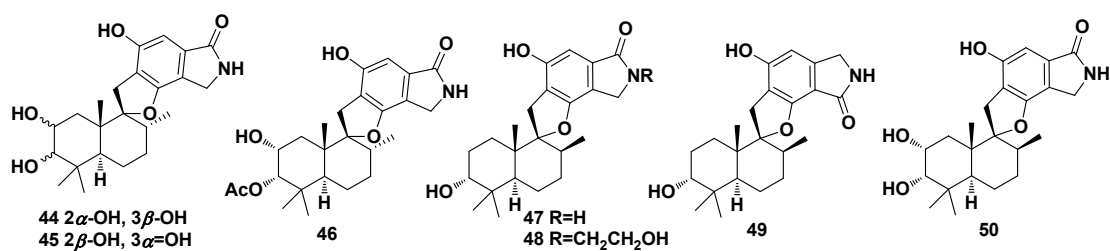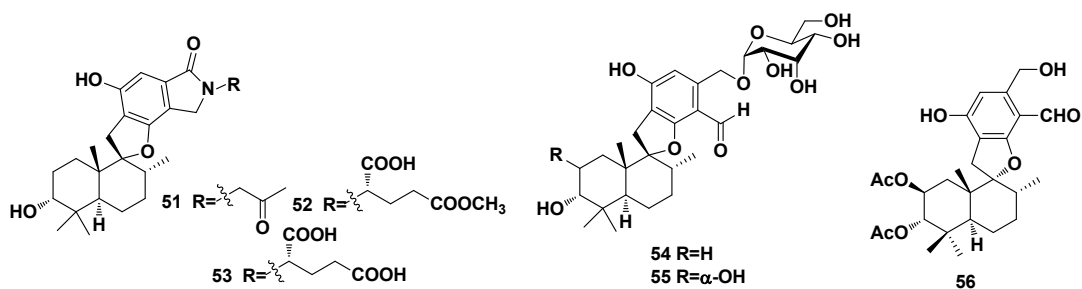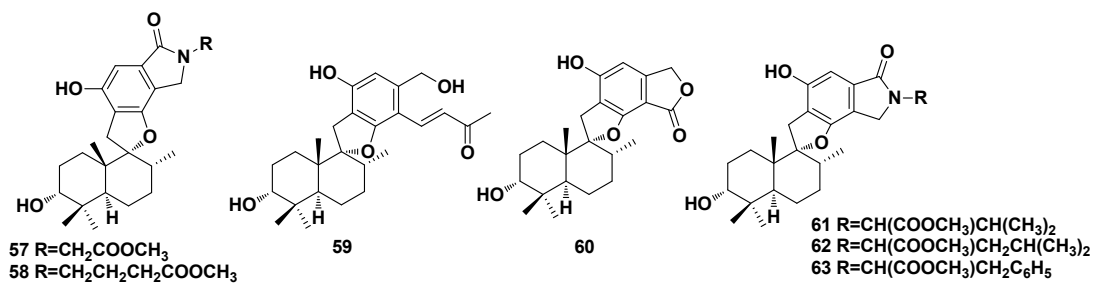

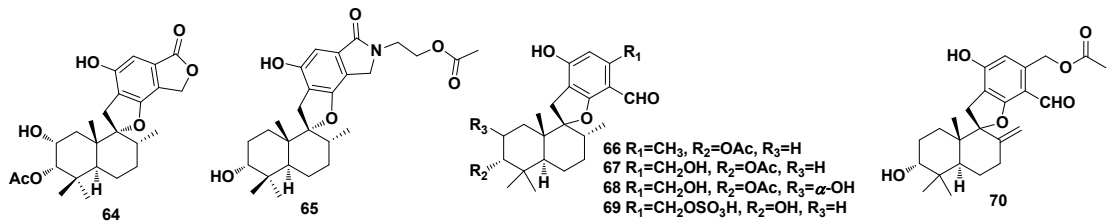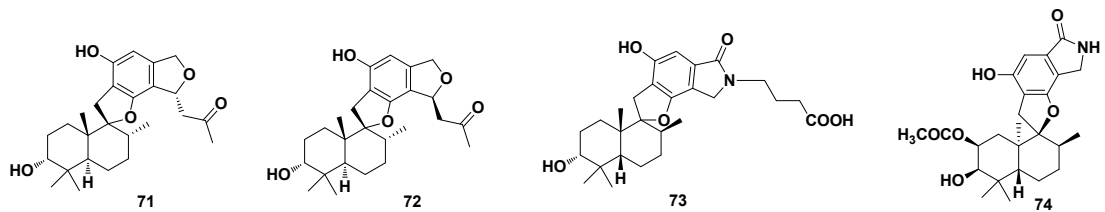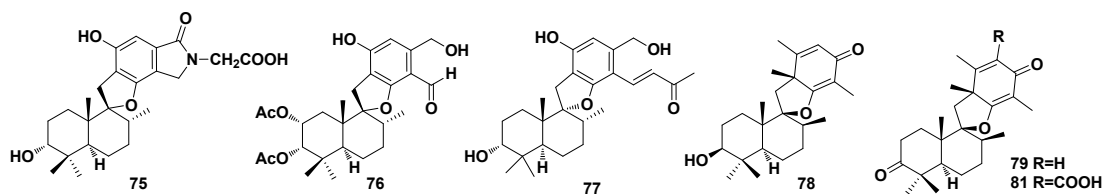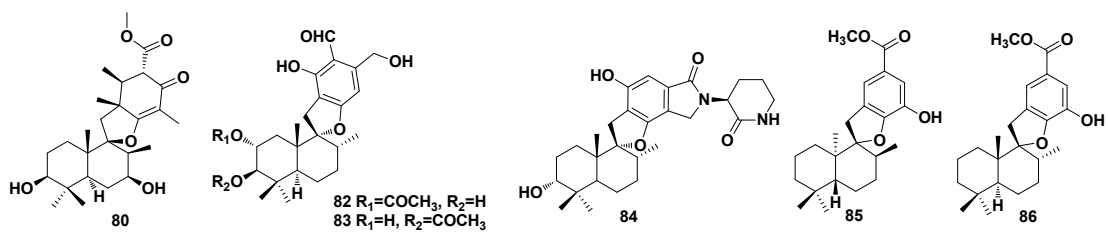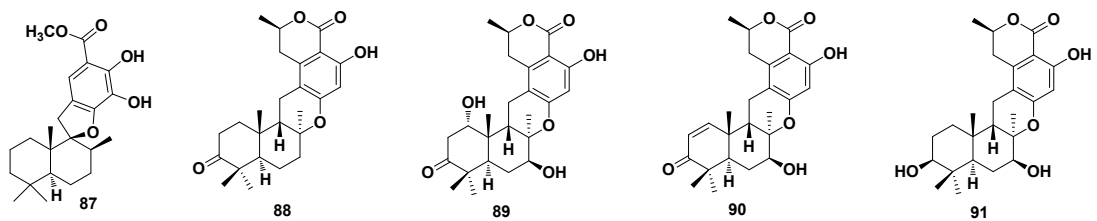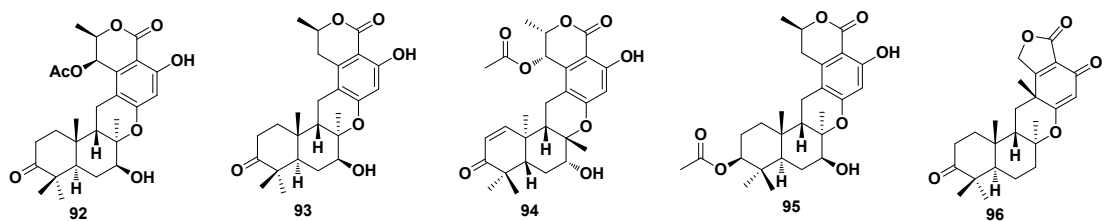

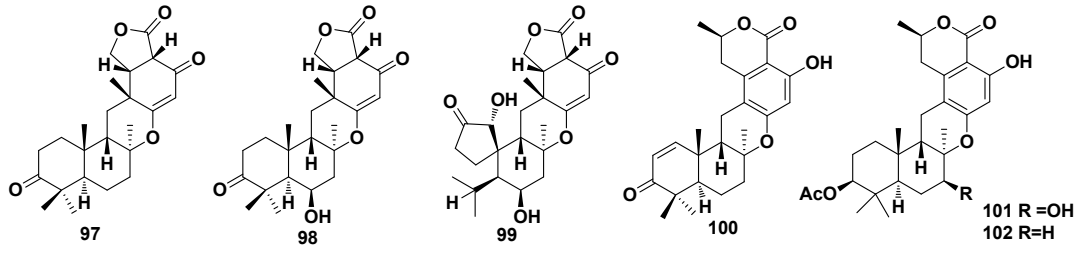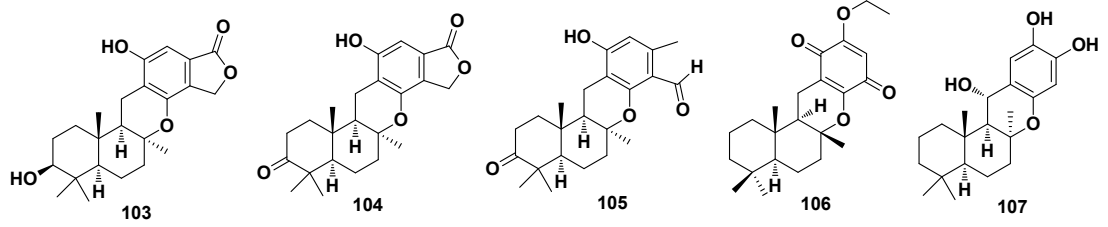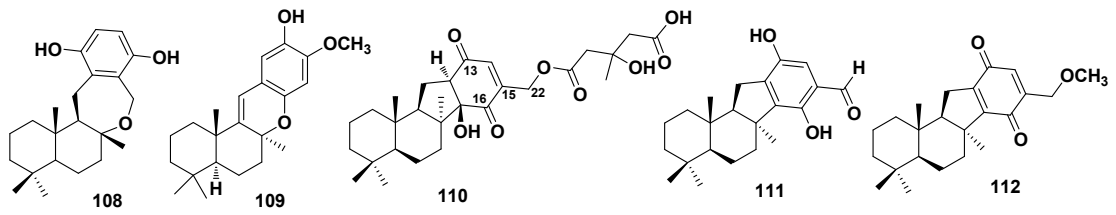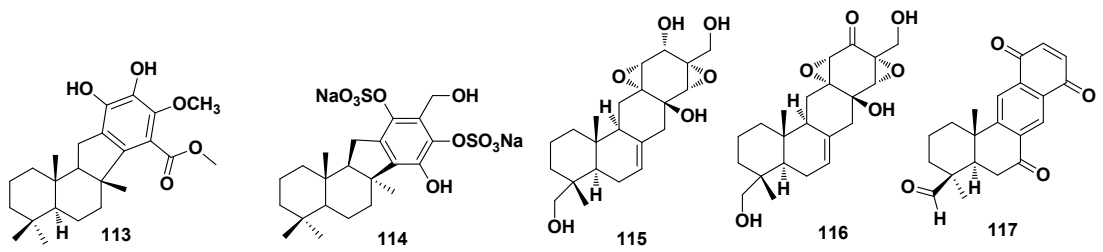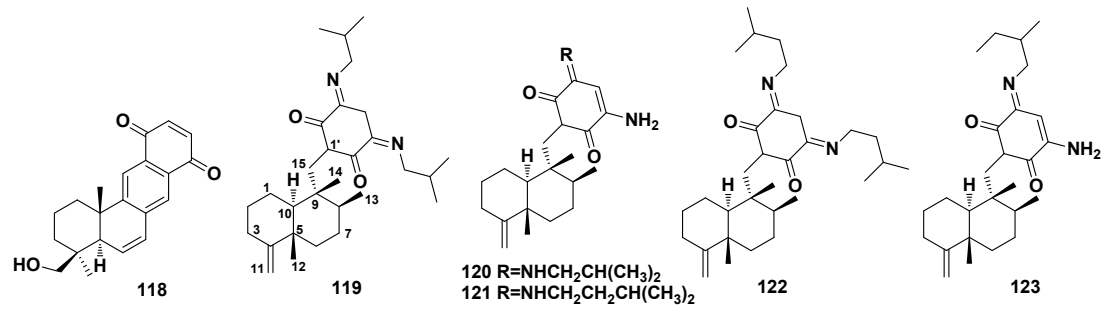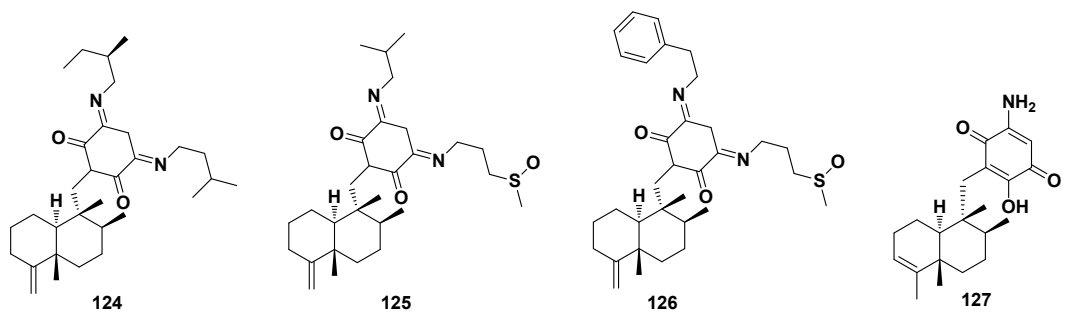

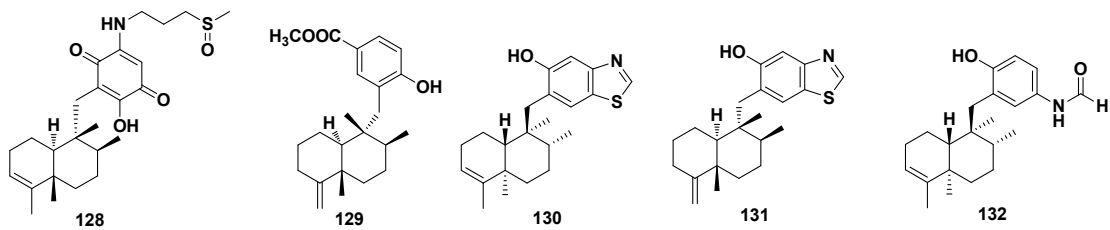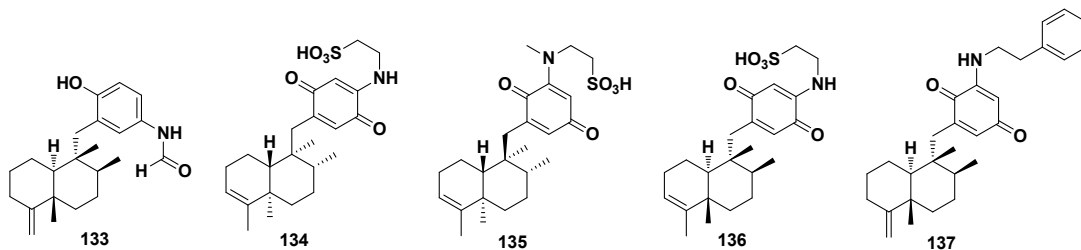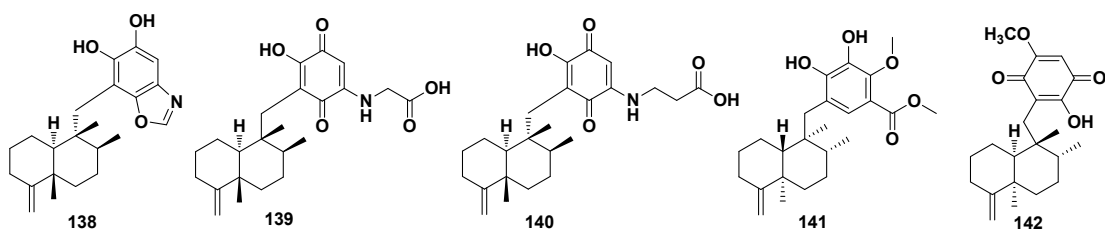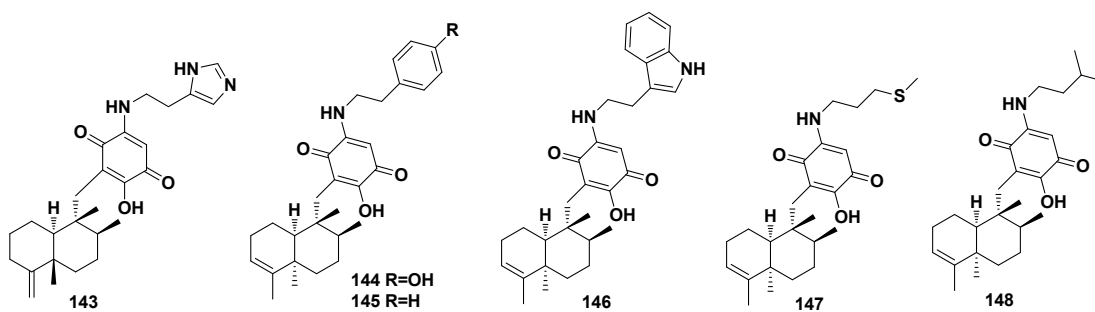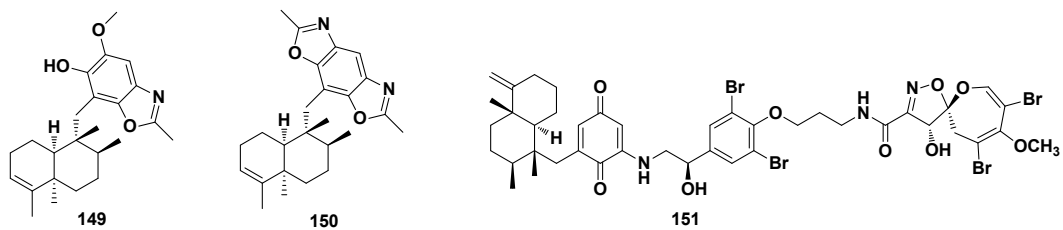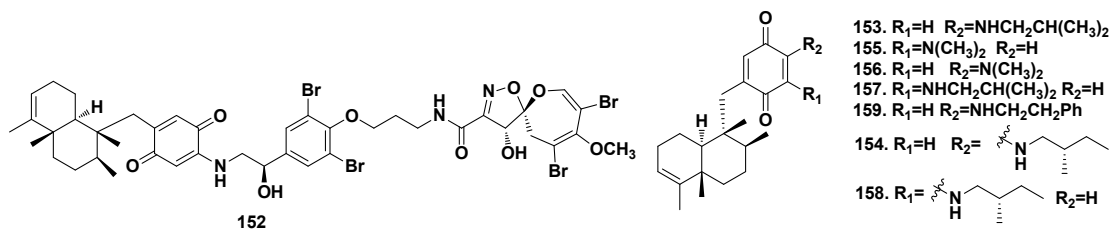

153.  $R_1=H$   $R_2=NHCH_2CH(CH_3)_2$   
 155.  $R_1=N(CH_3)_2$   $R_2=H$   
 156.  $R_1=H$   $R_2=N(CH_3)_2$   
 157.  $R_1=NHCH_2CH(CH_3)_2$   $R_2=H$   
 159.  $R_1=H$   $R_2=NHCH_2CH_2Ph$   
 154.  $R_1=H$   $R_2=$   
 158.  $R_1=$   $R_2=H$

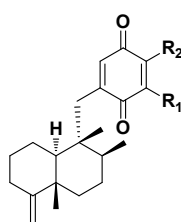

160.  $R_1 = \text{NHCH}_3$ ,  $R_2 = \text{H}$   
 161.  $R_1 = \text{H}$ ,  $R_2 = \text{NHCH}_3$   
 162.  $R_1 = \text{N}(\text{CH}_3)_2$ ,  $R_2 = \text{H}$   
 163.  $R_1 = \text{H}$ ,  $R_2 = \text{NHCH}_2\text{CH}(\text{CH}_3)_2$   
 164.  $R_1 = \text{H}$ ,  $R_2 = \text{N}(\text{CH}_2\text{CH}_2\text{CH}_2\text{CH}_3)$   
 165.  $R_1 = \text{H}$ ,  $R_2 = \text{NHCH}_2\text{CH}_2\text{Ph}$

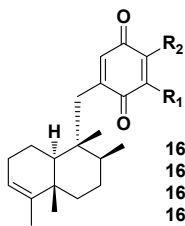

166.  $R_1 = \text{H}$ ,  $R_2 = \text{NHCH}_3$   
 167.  $R_1 = \text{NH}_2$ ,  $R_2 = \text{H}$   
 168.  $R_1 = \text{H}$ ,  $R_2 = \text{NH}_2$   
 169.  $R_1 = \text{NHCH}_2\text{CH}_2\text{Ph}$ ,  $R_2 = \text{H}$

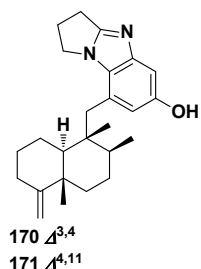

170.  $\Delta^{3,4}$   
 171.  $\Delta^{4,11}$

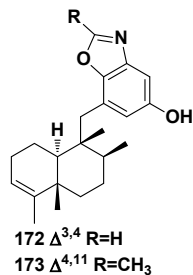

172.  $\Delta^{3,4}$ ,  $R = \text{H}$   
 173.  $\Delta^{4,11}$ ,  $R = \text{CH}_3$

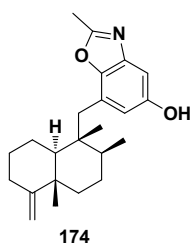

174

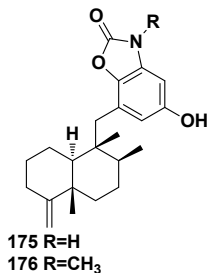

175.  $R = \text{H}$   
 176.  $R = \text{CH}_3$

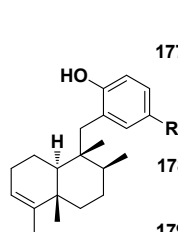

177.  $R =$

178.  $R =$

179.  $R = \text{NHCOCH}_3$   
 180.  $R = \text{NHCOCH}_2\text{CH}(\text{CH}_3)_2$

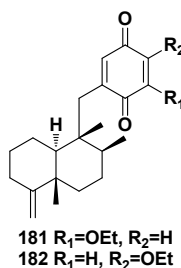

181.  $R_1 = \text{OEt}$ ,  $R_2 = \text{H}$   
 182.  $R_1 = \text{H}$ ,  $R_2 = \text{OEt}$

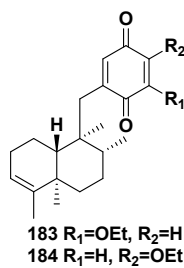

183.  $R_1 = \text{OEt}$ ,  $R_2 = \text{H}$   
 184.  $R_1 = \text{H}$ ,  $R_2 = \text{OEt}$

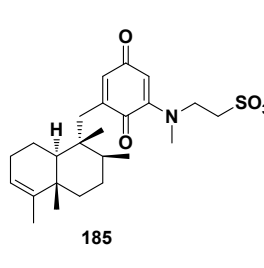

185

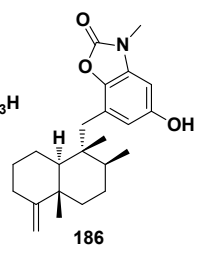

186

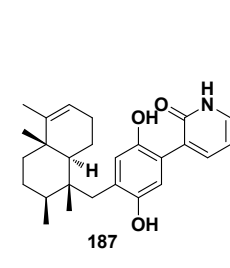

187

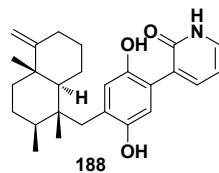

188

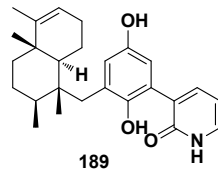

189

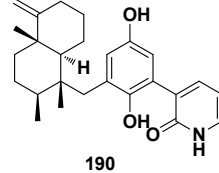

190

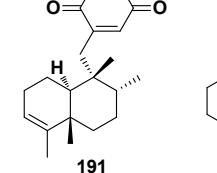

191

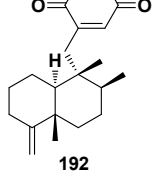

192

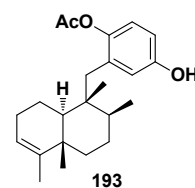

193

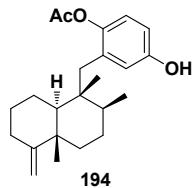

194

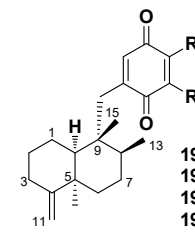

195.  $R_1 = \text{H}$ ,  $R_2 = \text{NH}_2$   
 196.  $R_1 = \text{NH}_2$ ,  $R_2 = \text{H}$   
 197.  $R_1 = \text{H}$ ,  $R_2 = \text{NHCH}_3$   
 198.  $R_1 = \text{NHCH}_3$ ,  $R_2 = \text{H}$

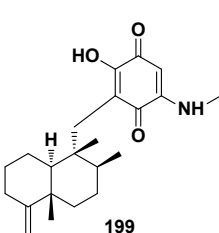

199

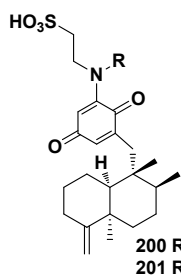

200.  $R = \text{H}$   
 201.  $R = \text{CH}_3$

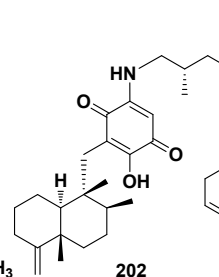

202

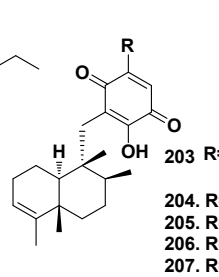

203.  $R =$   
 204.  $R = \text{NHCH}_2\text{CH}_2\text{CH}(\text{CH}_3)_2$   
 205.  $R = \text{NHCH}_2\text{CH}(\text{CH}_3)_2$   
 206.  $R = \text{NHCH}_2\text{CH}_2\text{Ph}$   
 207.  $R = \text{NHCH}_2\text{CH}_2\text{SO}_3\text{H}$

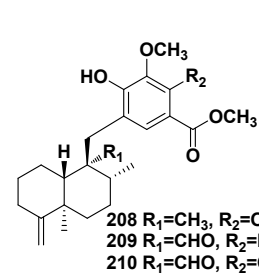

208.  $R_1 = \text{CH}_3$ ,  $R_2 = \text{OH}$   
 209.  $R_1 = \text{CHO}$ ,  $R_2 = \text{H}$   
 210.  $R_1 = \text{CHO}$ ,  $R_2 = \text{OH}$

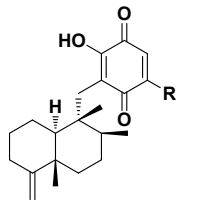

211. R=NHCH<sub>3</sub>  
212. R=NH(CH<sub>2</sub>)<sub>3</sub>SCH<sub>3</sub>

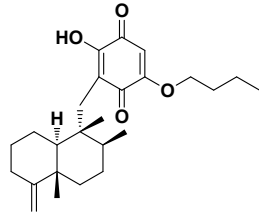

213

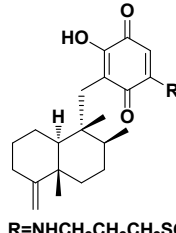

214. R=NHCH<sub>2</sub>CH<sub>2</sub>CH<sub>2</sub>SOCH<sub>3</sub>  
215. R=NHCH<sub>2</sub>CH<sub>2</sub>SO<sub>3</sub>H  
216. R=NHCH<sub>2</sub>CH<sub>2</sub>OH

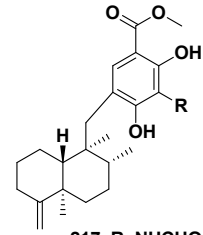

217. R=NHCHO  
218. R=NHCOCH<sub>2</sub>OH

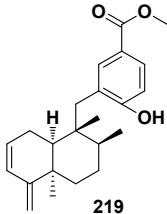

219

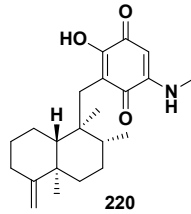

220

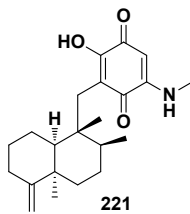

221

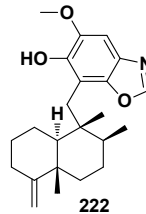

222

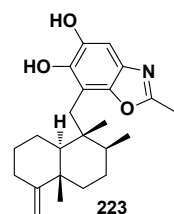

223

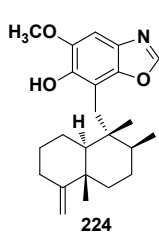

224

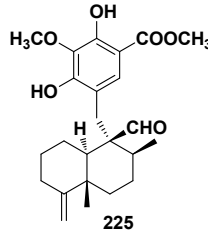

225

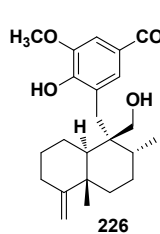

226

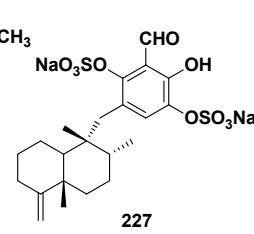

227

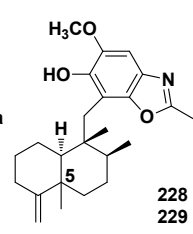

228 5-βCH<sub>3</sub>  
229 5-αCH<sub>3</sub>

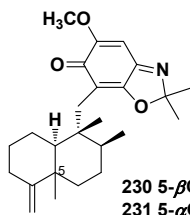

230 5-βCH<sub>3</sub>  
231 5-αCH<sub>3</sub>

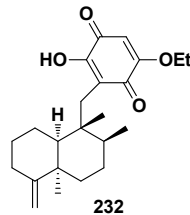

232

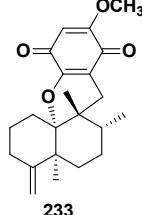

233

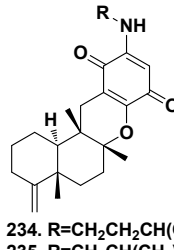

234. R=CH<sub>2</sub>CH<sub>2</sub>CH(CH<sub>3</sub>)<sub>2</sub>  
235. R=CH<sub>2</sub>CH(CH<sub>3</sub>)<sub>2</sub>

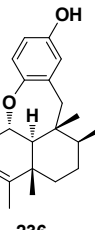

236

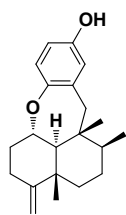

237

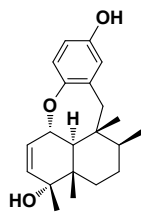

238

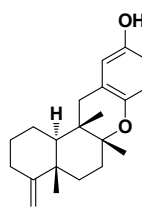

239

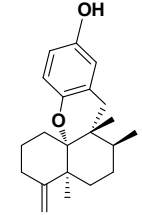

240

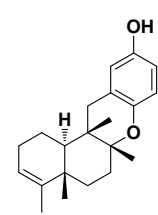

241

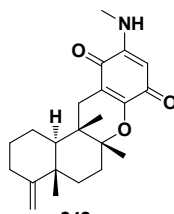

242

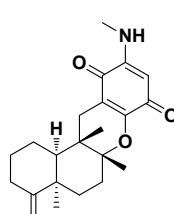

243

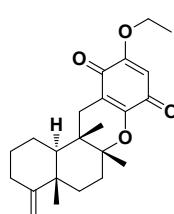

244

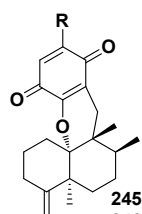

245. R=OCH<sub>2</sub>CH<sub>3</sub>  
246. R=NHCH<sub>3</sub>

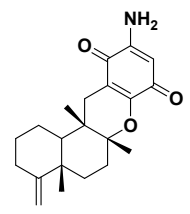

247



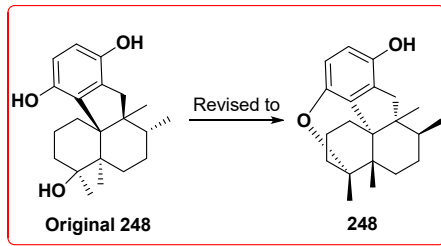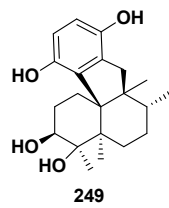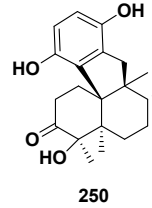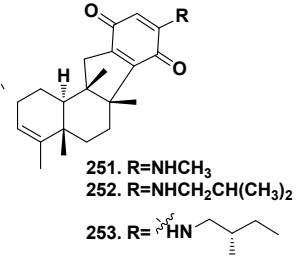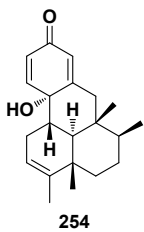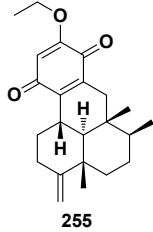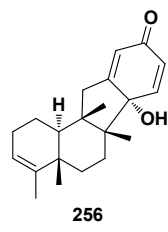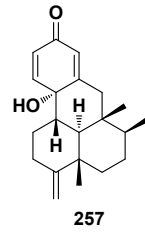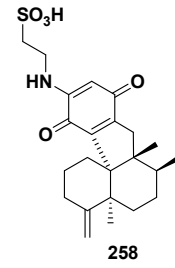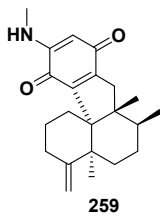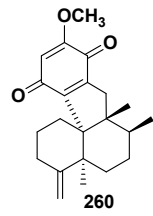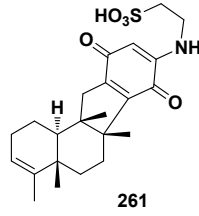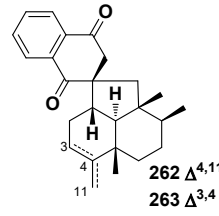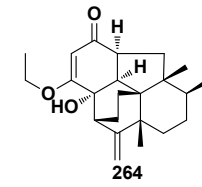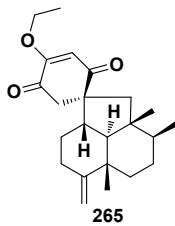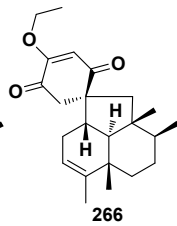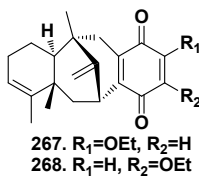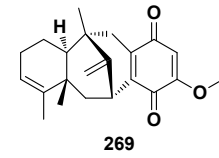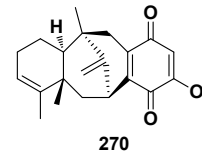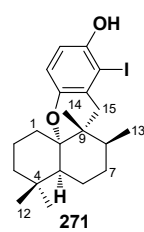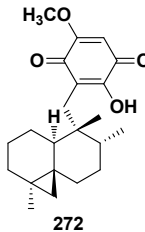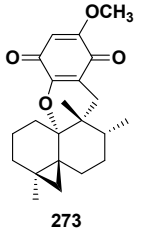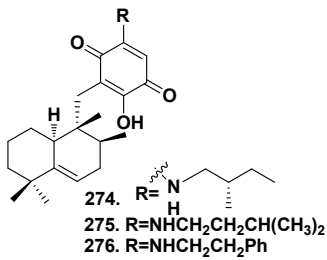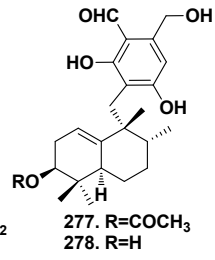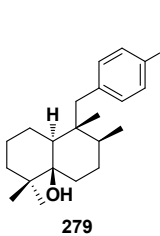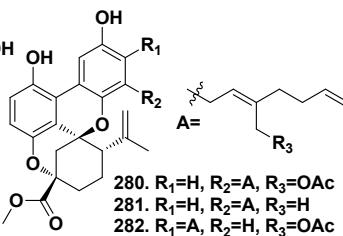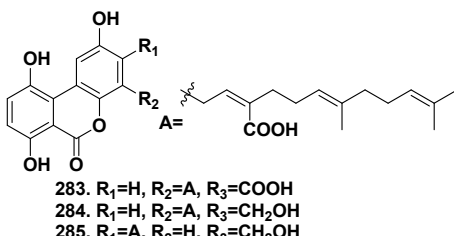

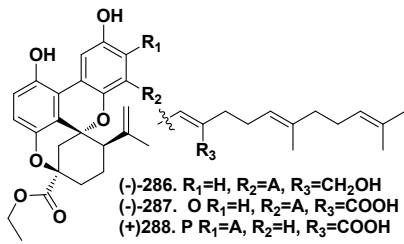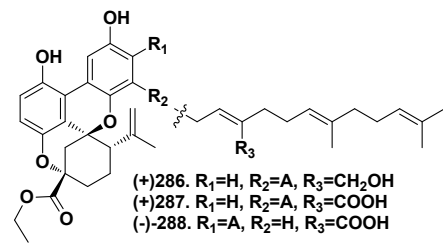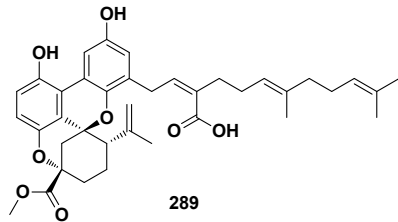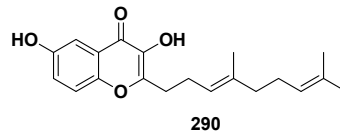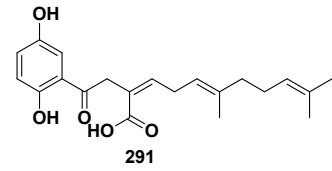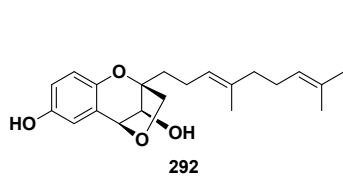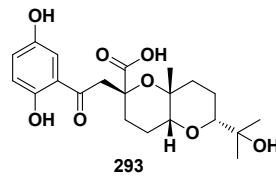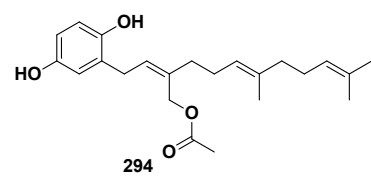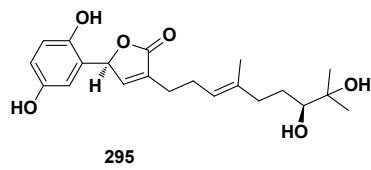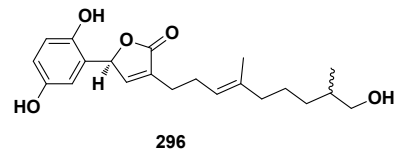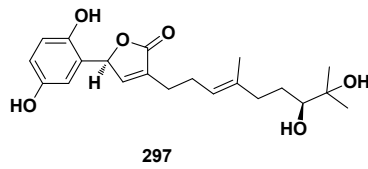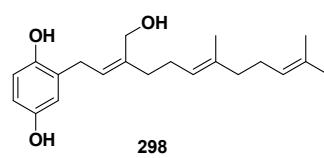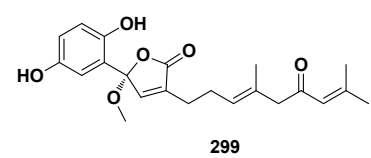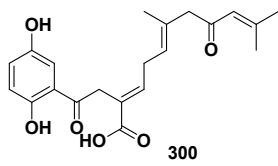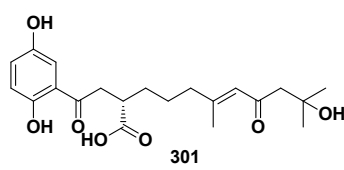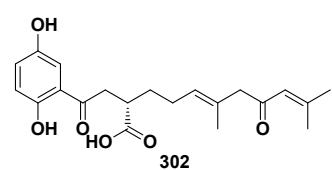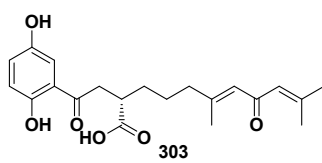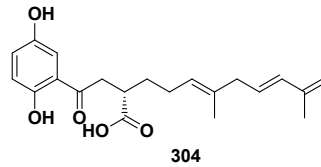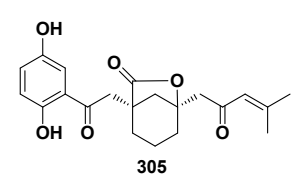

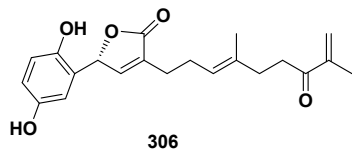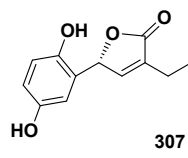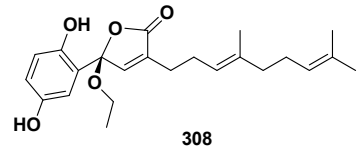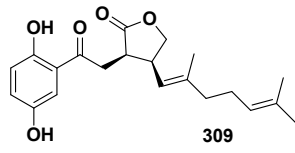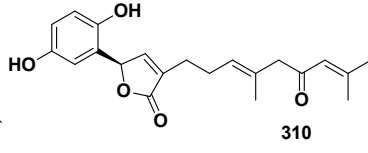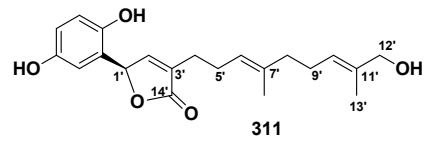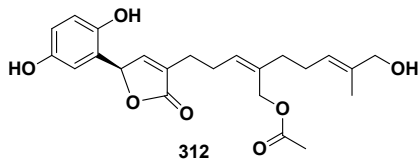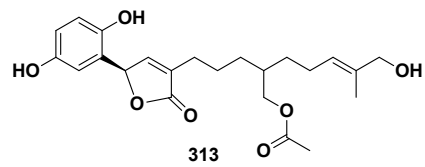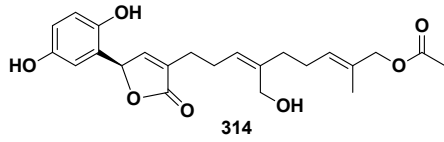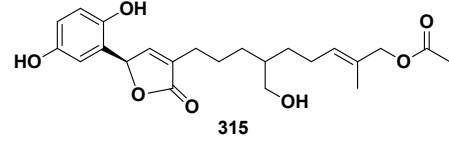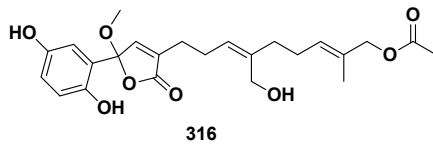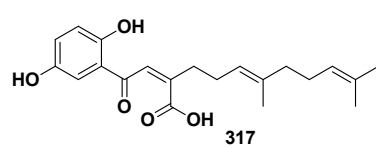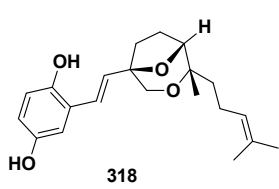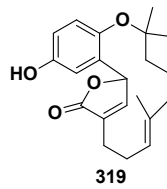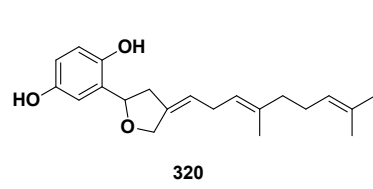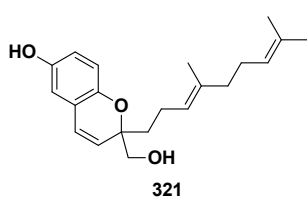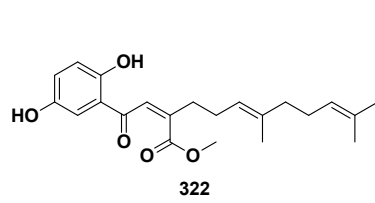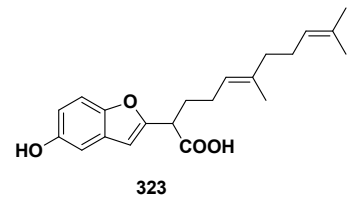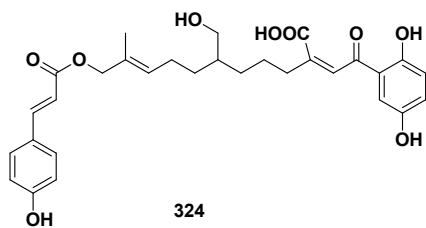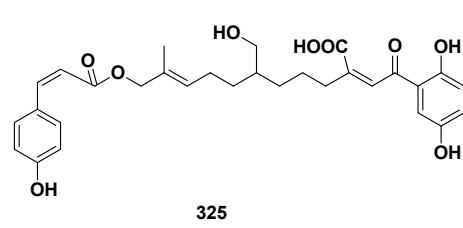

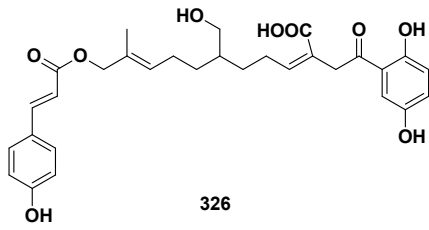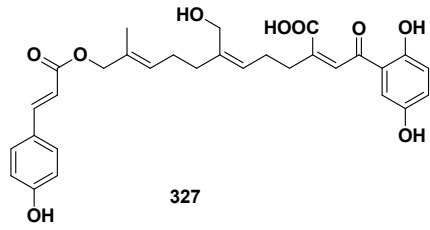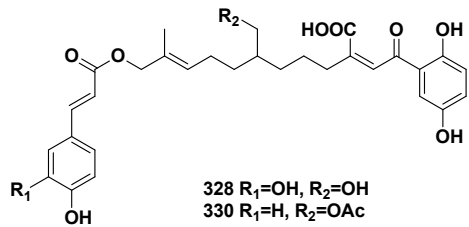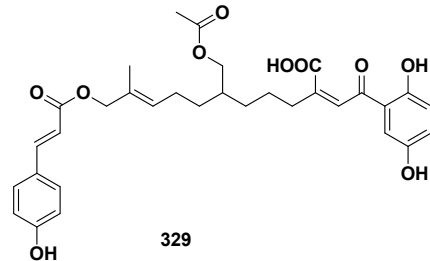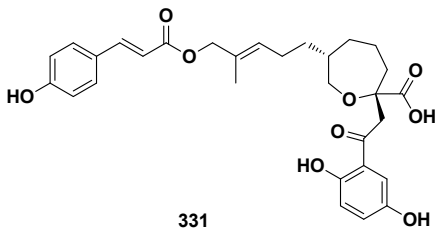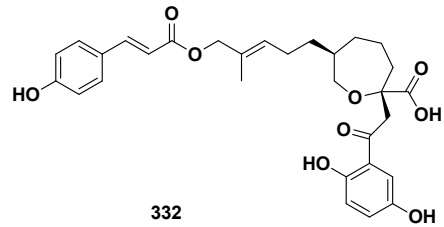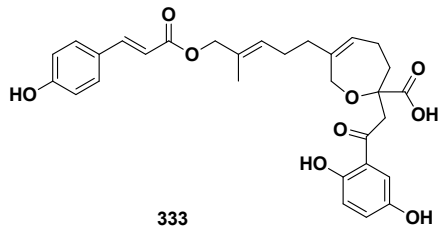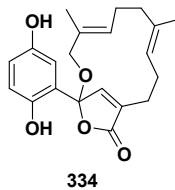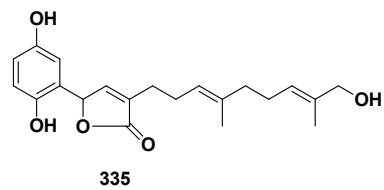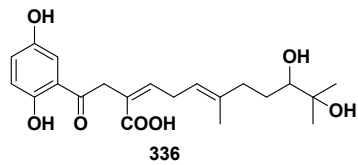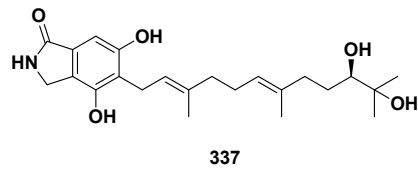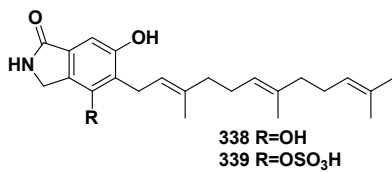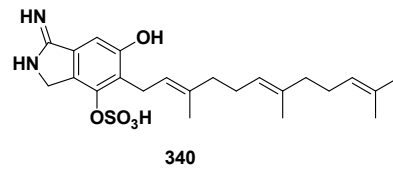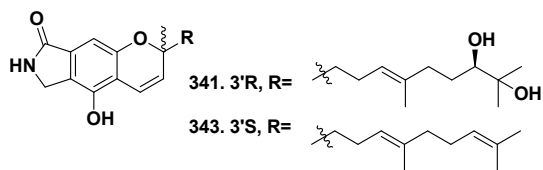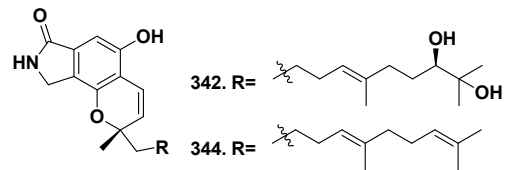

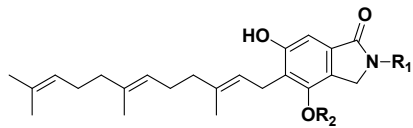

345.  $R_1=CH_2CH_2OH$ ,  $R_2=H$   
 346.  $R_1=CH_2CH_2OH$ ,  $R_2=SO_3H$   
 347.  $R_1=CH_2CH_2CH_2COOH$ ,  $R_2=SO_3H$   
 348.  $R_1=(N-6)-\alpha-D-Glc$ ,  $R_2=SO_3H$

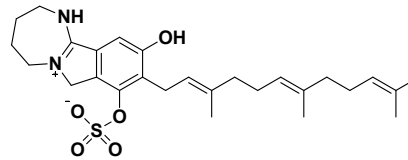

349

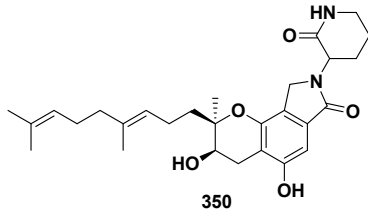

350

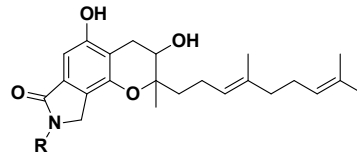

351 R=

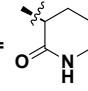

353 R=

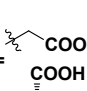

352 R=

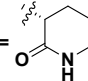

354 R=

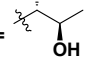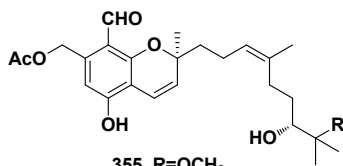

355.  $R=OCH_3$   
 356.  $R=OH$

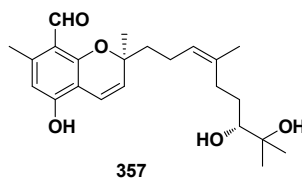

357

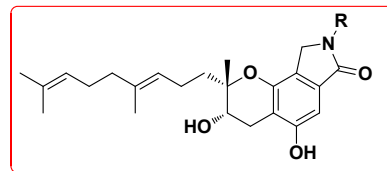

358 R=

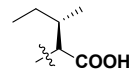

359 R=

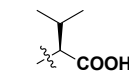

360 R=

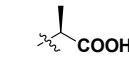

361 R=

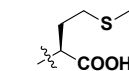

362 R=

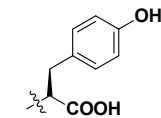

363 R=

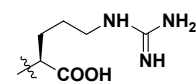

364 R=

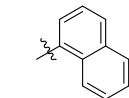

365 R=

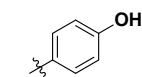

366 R=

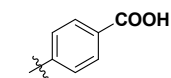

367 R=

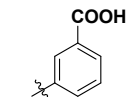

368 R=

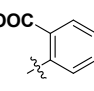

369 R=

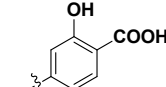

370 R=

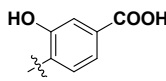

371 R=

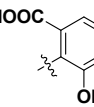

372 R=

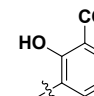

373 R=

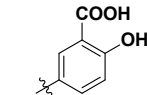

374 R=

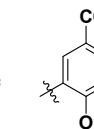

375 R=

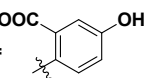

376 R=

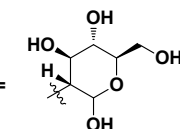

377 R=

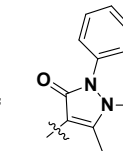

378 R=

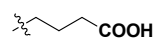

379 R=

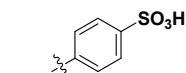

380 R=

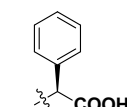

381 R=

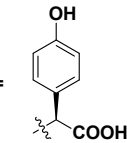

382 R=

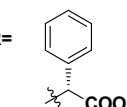

383 R=

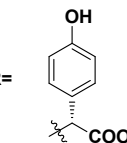

384 R=

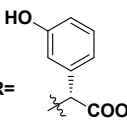

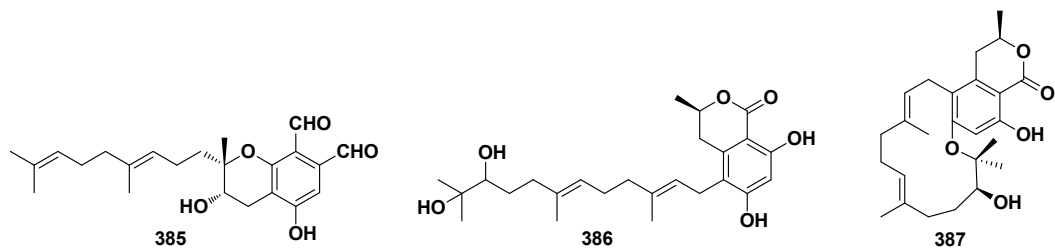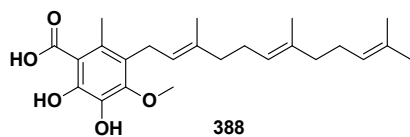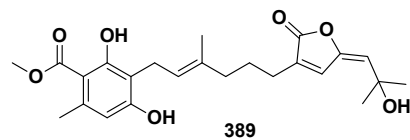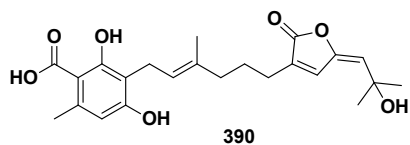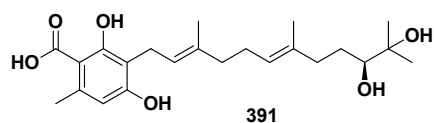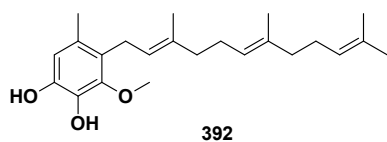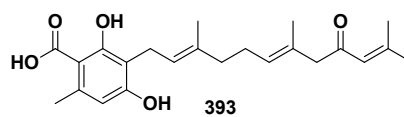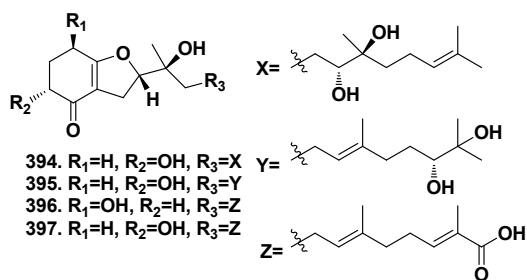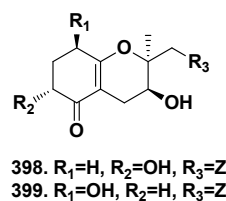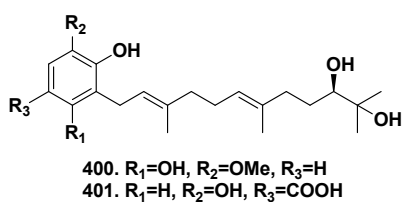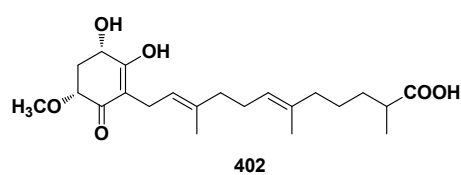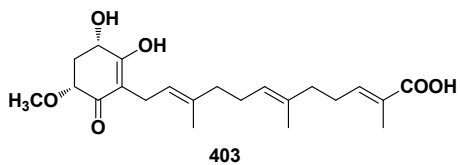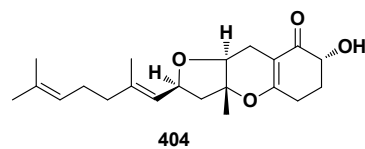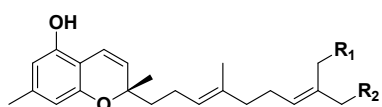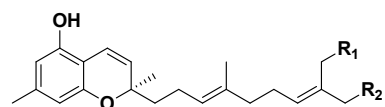

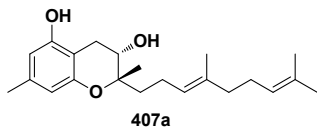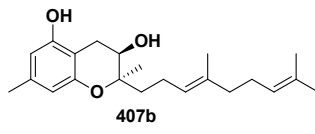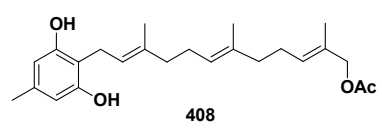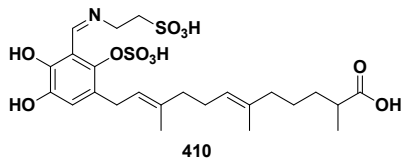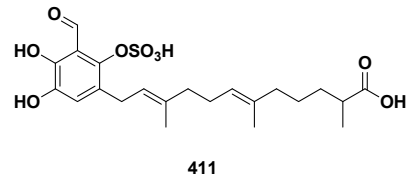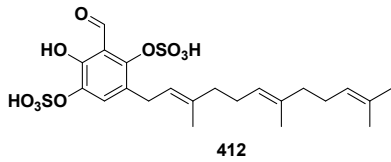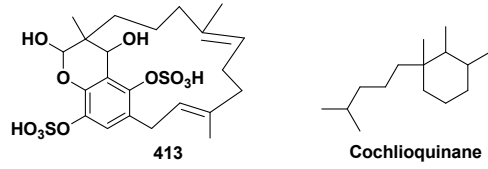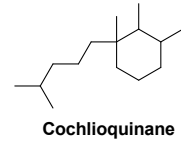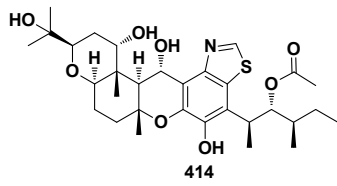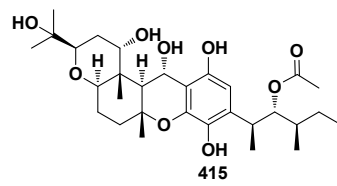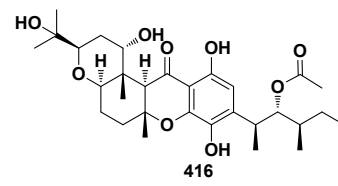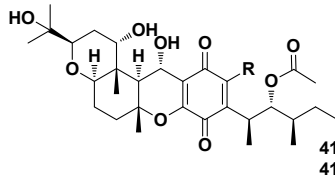

418. R=NH<sub>2</sub>

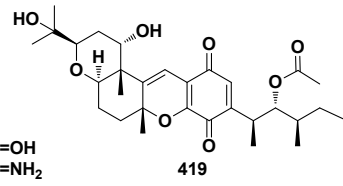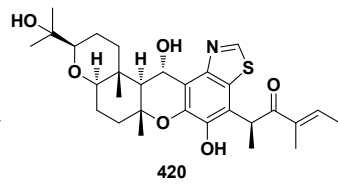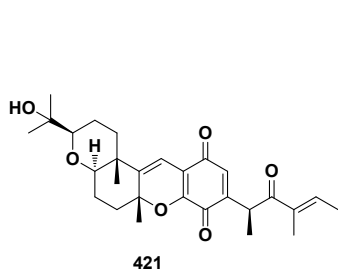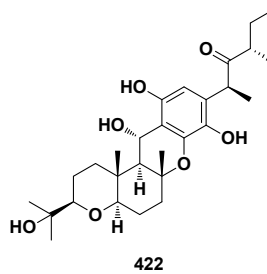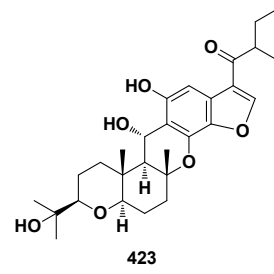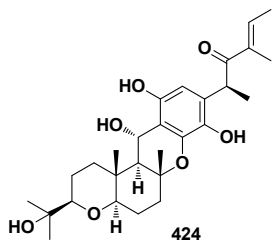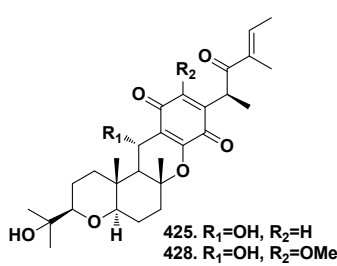

428. R<sub>1</sub>=OH, R<sub>2</sub>=OMe

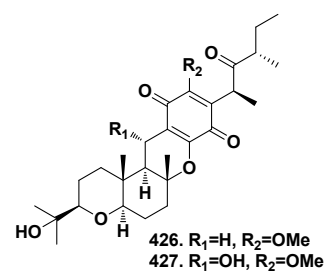

427. R<sub>1</sub>=OH, R<sub>2</sub>=OMe

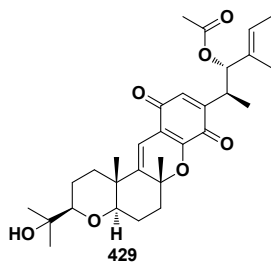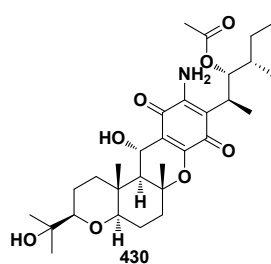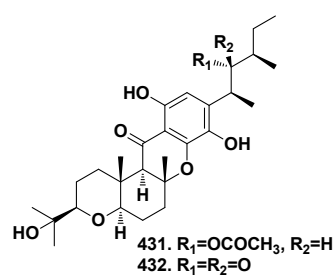

432. R<sub>1</sub>=R<sub>2</sub>=O

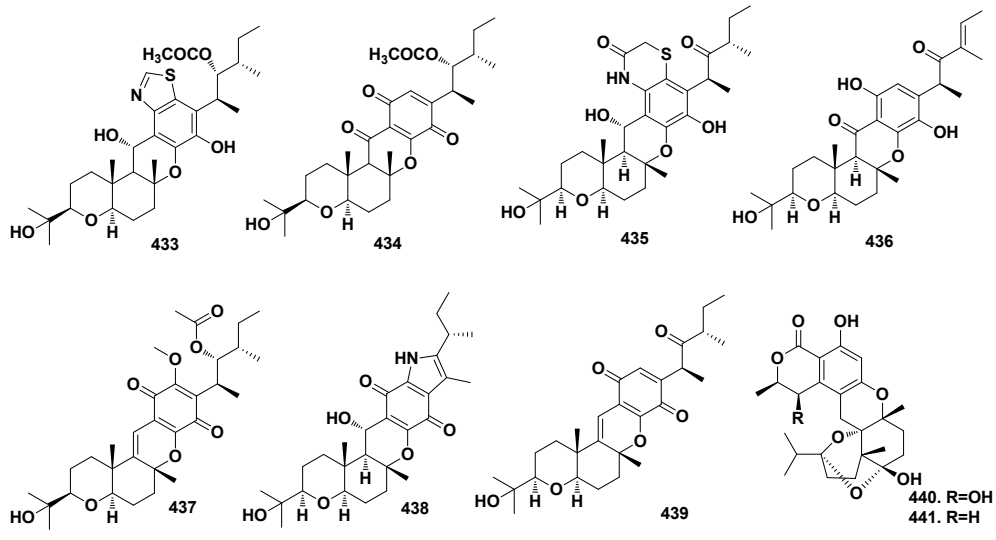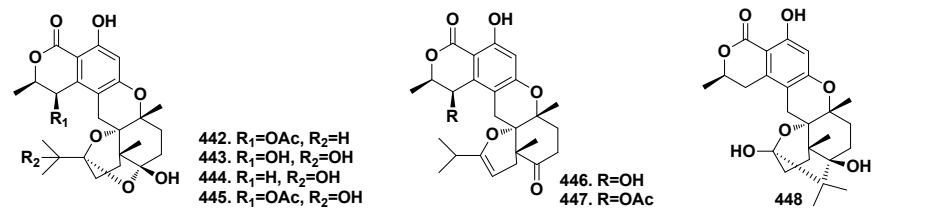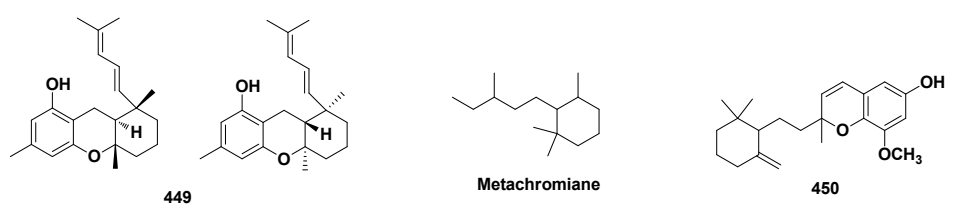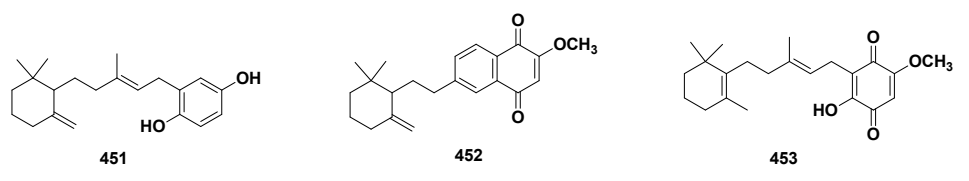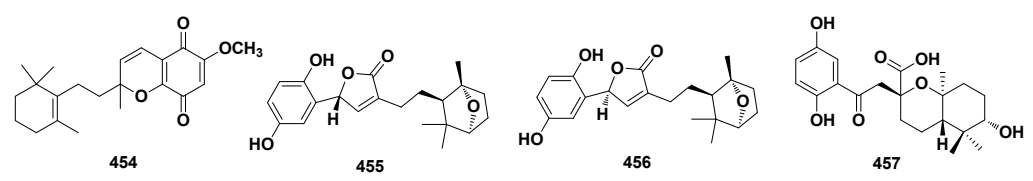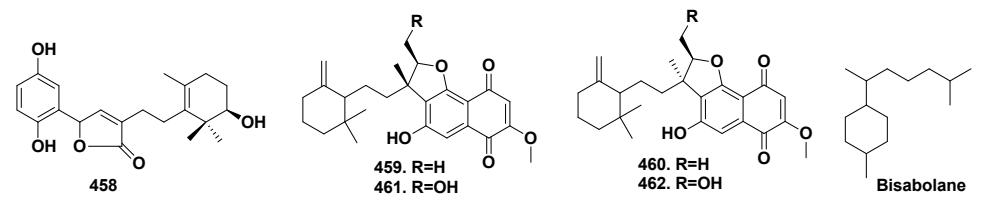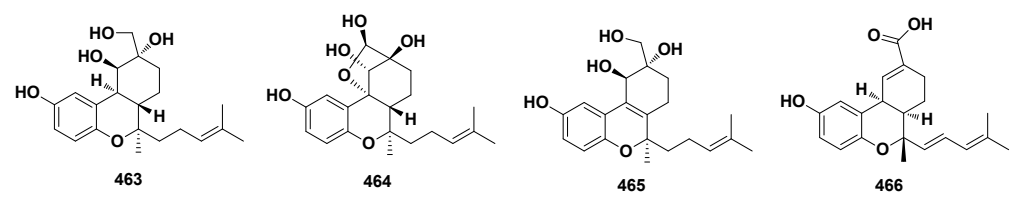



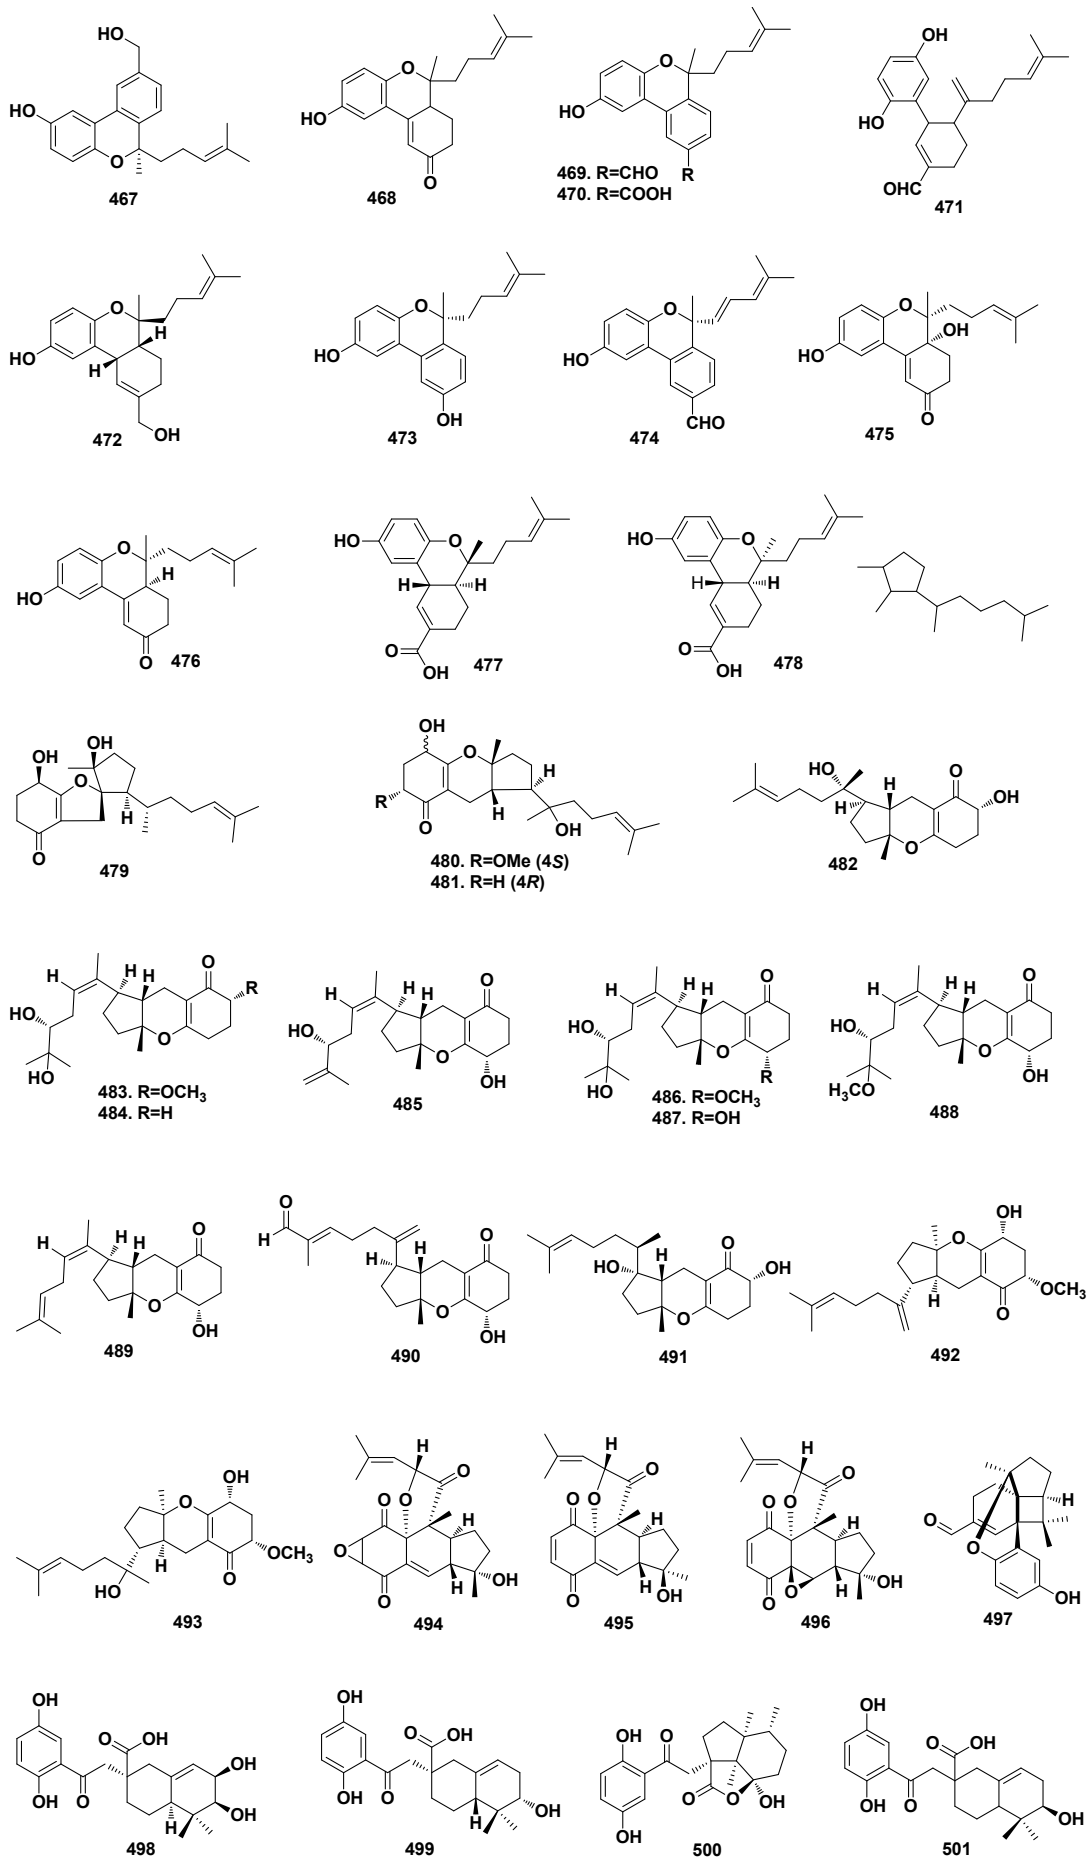

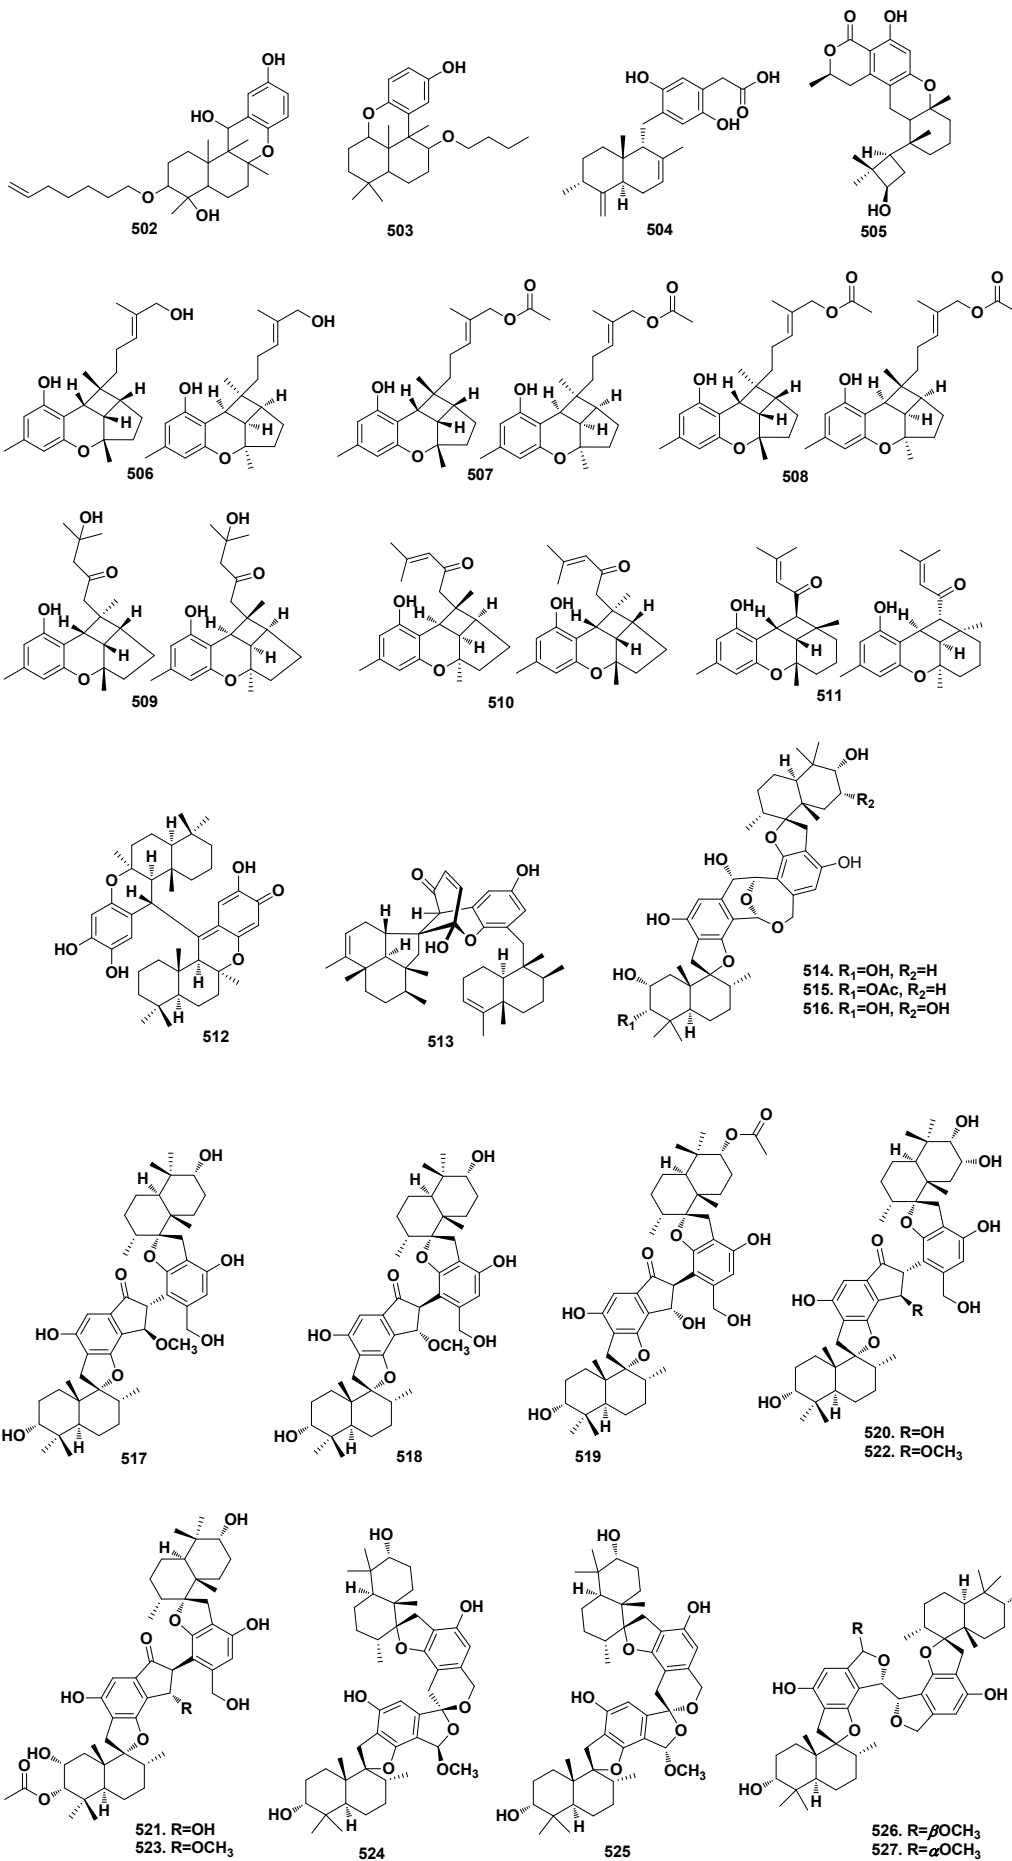

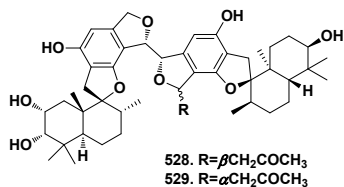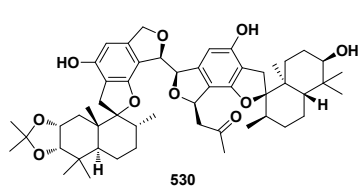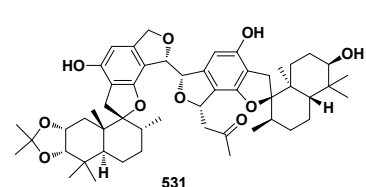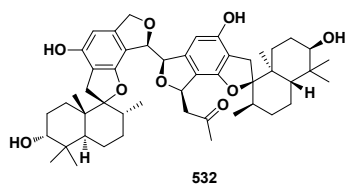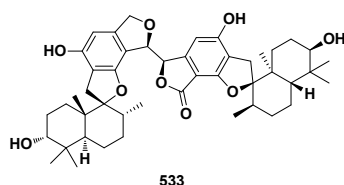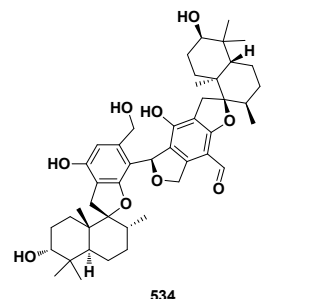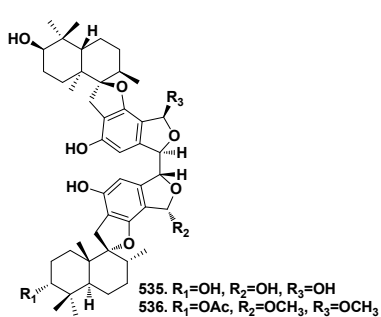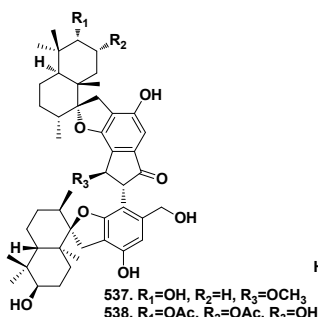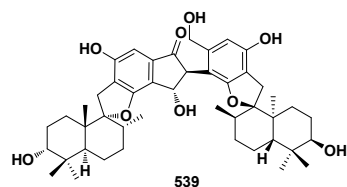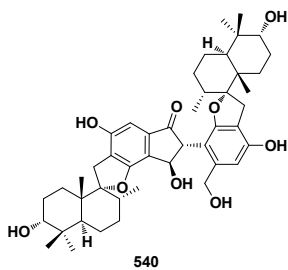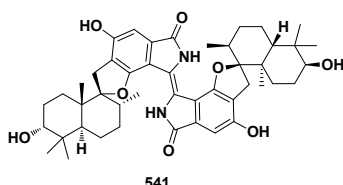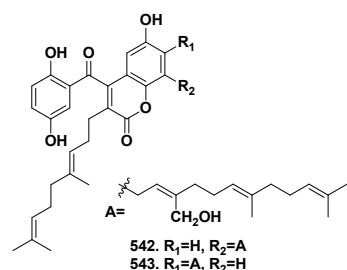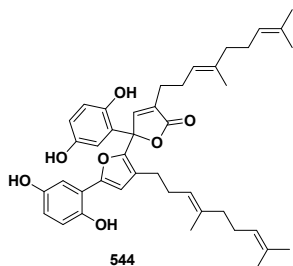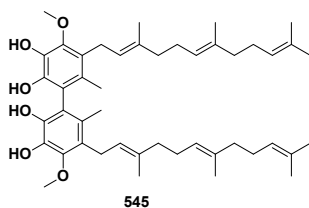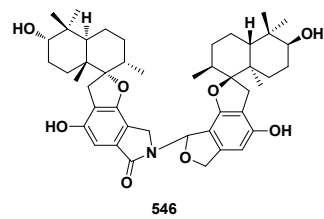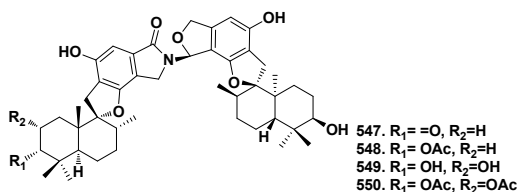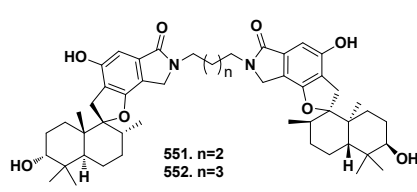

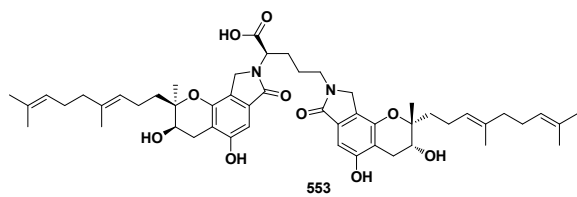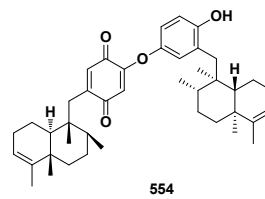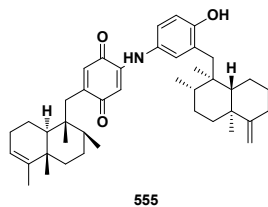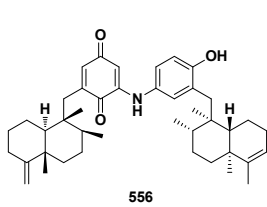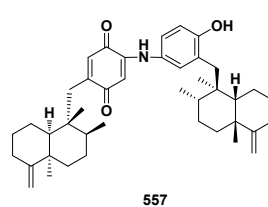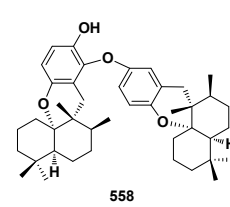

Supplement: d2np00045h1.pdf [file d2np00045h1.pdf]
